# Supplementary material
Source: publisher figshare collection journal article supplement (https://sage.figshare.com/ndownloader/files/15342407)
Supplement: Supplementary file 1 [file 15342407]

**Table A2**: Type III and Type IV splitting the composite dimensions (unanchored)

|  | **III (Baseline)** | | | **IVa (PD split)** | | | **IVb (AD split)** | | |
| --- | --- | --- | --- | --- | --- | --- | --- | --- | --- |
| **Parameter** | **Coef** | **SE** | **P** | **Coef** | **SE** | **P** | **Coef** | **SE** | **P** |
| M3x D | **-0.032** | 0.006 | 0.000 | **-0.057** | 0.011 | 0.000 | **-0.033** | 0.011 | 0.003 |
| M5x D | **-0.140** | 0.006 | 0.000 | **-0.128** | 0.011 | 0.000 | **-0.134** | 0.011 | 0.000 |
| SC3x D | **-0.030** | 0.006 | 0.000 | **-0.046** | 0.011 | 0.000 | **-0.022** | 0.011 | 0.034 |
| SC5x D | **-0.121** | 0.006 | 0.000 | **-0.142** | 0.012 | 0.000 | **-0.112** | 0.012 | 0.000 |
| UA3x D | **-0.036** | 0.006 | 0.000 | -0.011 | 0.011 | 0.311 | 0.001 | 0.011 | 0.904 |
| UA5x D | **-0.097** | 0.006 | 0.000 | **-0.062** | 0.009 | 0.000 | **-0.074** | 0.010 | 0.000 |
| PD3x D | **-0.036** | 0.006 | 0.000 |  |  |  | **-0.024** | 0.010 | 0.018 |
| PD5x D | **-0.178** | 0.006 | 0.000 |  |  |  | **-0.159** | 0.011 | 0.000 |
| AD3x D | **-0.041** | 0.006 | 0.000 | **-0.054** | 0.010 | 0.000 |  |  |  |
| AD5x D | **-0.163** | 0.006 | 0.000 | **-0.177** | 0.012 | 0.000 |  |  |  |
| Pa3x D |  |  |  | **-0.029** | 0.010 | 0.003 |  |  |  |
| Pa5x D |  |  |  | **-0.171** | 0.012 | 0.000 |  |  |  |
| Di3x D |  |  |  | **-0.029** | 0.010 | 0.003 |  |  |  |
| Di5x D |  |  |  | **-0.062** | 0.010 | 0.000 |  |  |  |
| An3x D |  |  |  |  |  |  | **-0.020** | 0.010 | 0.035 |
| An5x D |  |  |  |  |  |  | **-0.076** | 0.011 | 0.000 |
| De3x D |  |  |  |  |  |  | **-0.068** | 0.010 | 0.000 |
| De5x D |  |  |  |  |  |  | **-0.194** | 0.012 | 0.000 |
| T | **0.394** | 0.019 | 0.000 | **0.442** | 0.035 | 0.000 | **0.396** | 0.035 | 0.000 |
| No of respondents | 700 |  |  | 225 |  |  | 225 |  |  |
| No of choices | 7000 |  |  | 2250 |  |  | 2250 |  |  |
| Log Likelihood | -3353 |  |  | -1147 |  |  | -1110 |  |  |

Coefficients with p < 0.05 in bold.
